# Supplementary material for: Prenatal Health Care Outcomes Before and During the COVID-19 Pandemic Among Pregnant Individuals and Their Newborns in an Integrated US Health System
Source: PubMed Central journal article supplement (PMC10354684; doi:10.1001/jamanetworkopen.2023.24011), 2023-07-18
Supplement: jamanetwopen-e2324011-s002.pdf [file jamanetwopen-e2324011-s002.pdf]

## Data Sharing Statement

Ferrara. Prenatal Health Care Outcomes Before and During the COVID-19 Pandemic Among Pregnant Individuals and Their Newborns in an Integrated US Health System. *JAMA Network Open*. Published July 18, 2023. doi:10.1001/jamanetworkopen.2023.24011

### Data

**Data available:** Yes

**Data types:** Deidentified participant data

**How to access data:** request for data must be sent to [assiamira.ferrara@kp.org](mailto:assiamira.ferrara@kp.org)

**When available:** With publication

### Supporting Documents

**Document types:** None

### Additional Information

**Who can access the data:** researchers whose proposed use of the data has been approved by their IRB and our IRB

**Types of analyses:** Only for replication of our findings

**Mechanisms of data availability:** after IRB approval of a proposal and with a signed data access agreement
